# Supplementary material for: Identification and Characterization of Circular RNAs As a New Class of Putative Biomarkers in Human Blood
Source: PubMed Central journal article supplement (PMC4617279; doi:10.1371/journal.pone.0141214), 2015-10-20
Supplement: pone.0141214.s004.pdf [file pone.0141214.s004.pdf]

blood circRNA

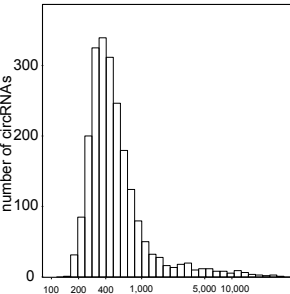

cerebellum circRNA

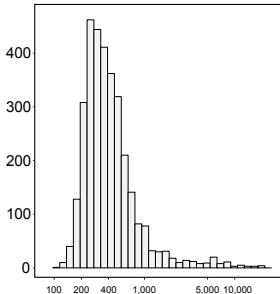

liver circRNA

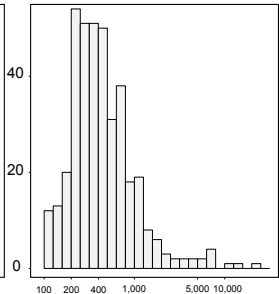

spliced length in nt
