# Supplementary material for: Identification and Characterization of Circular RNAs As a New Class of Putative Biomarkers in Human Blood
Source: PubMed Central journal article supplement (PMC4617279; doi:10.1371/journal.pone.0141214), 2015-10-20

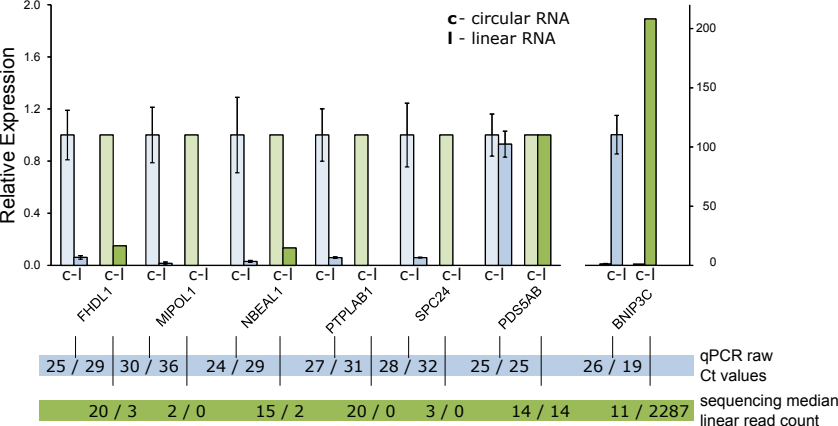

Supplement: pone.0141214.s008.pdf [file pone.0141214.s008.pdf]
